# Supplementary material for: Trends in the socioeconomic patterning of overweight/obesity in India: a repeated cross-sectional study using nationally representative data
Source: PubMed Central journal article supplement (PMC6196932; doi:10.1136/bmjopen-2018-023935), 2018-10-21

## Appendix

Figure A1. Predicted prevalence\* of overweight/obesity in India by Education (using South Asian BMI cut-offs) (1998-2016)

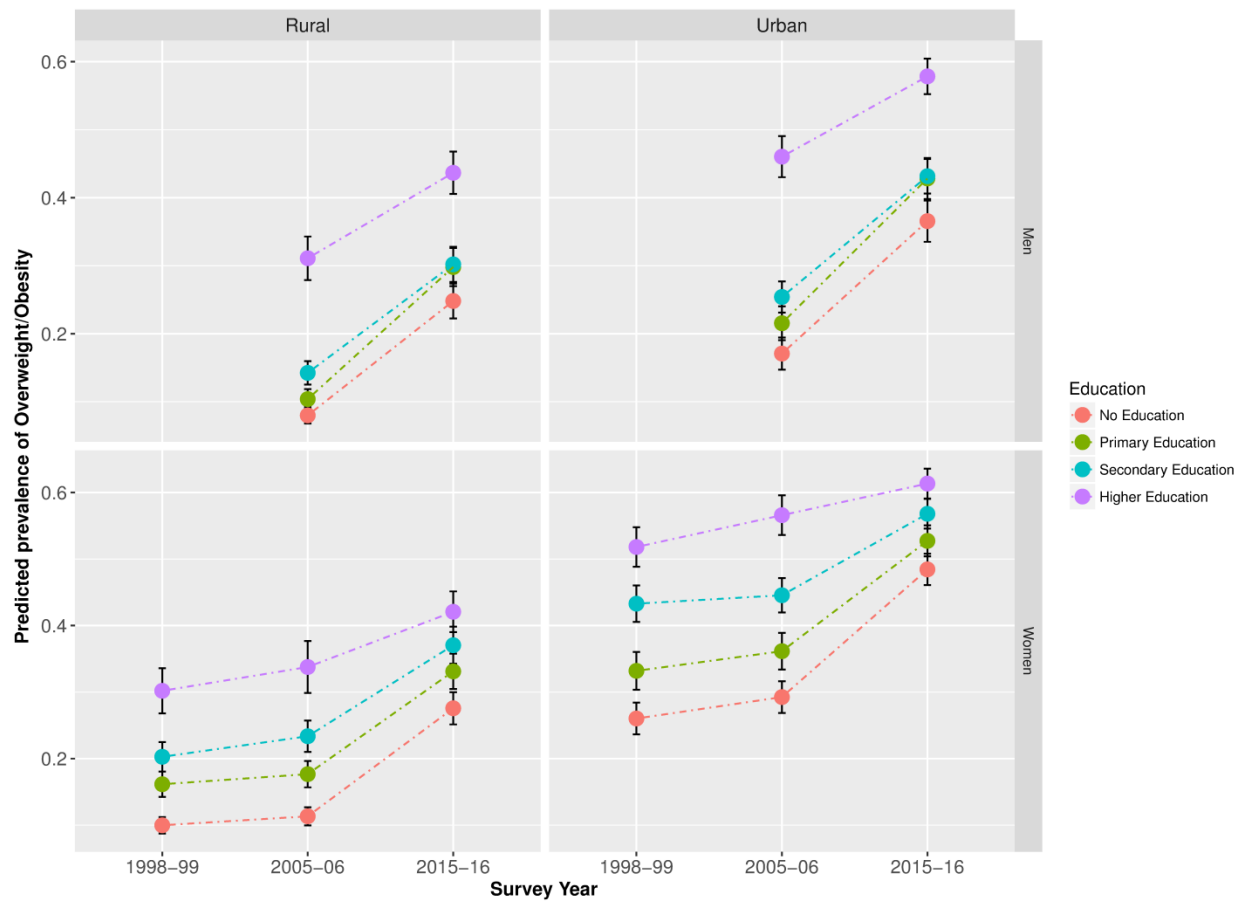

Figure A2. Predicted prevalence\* of overweight/obesity in India by Standard of Living (using South Asian BMI cut-offs) (1998-2016)

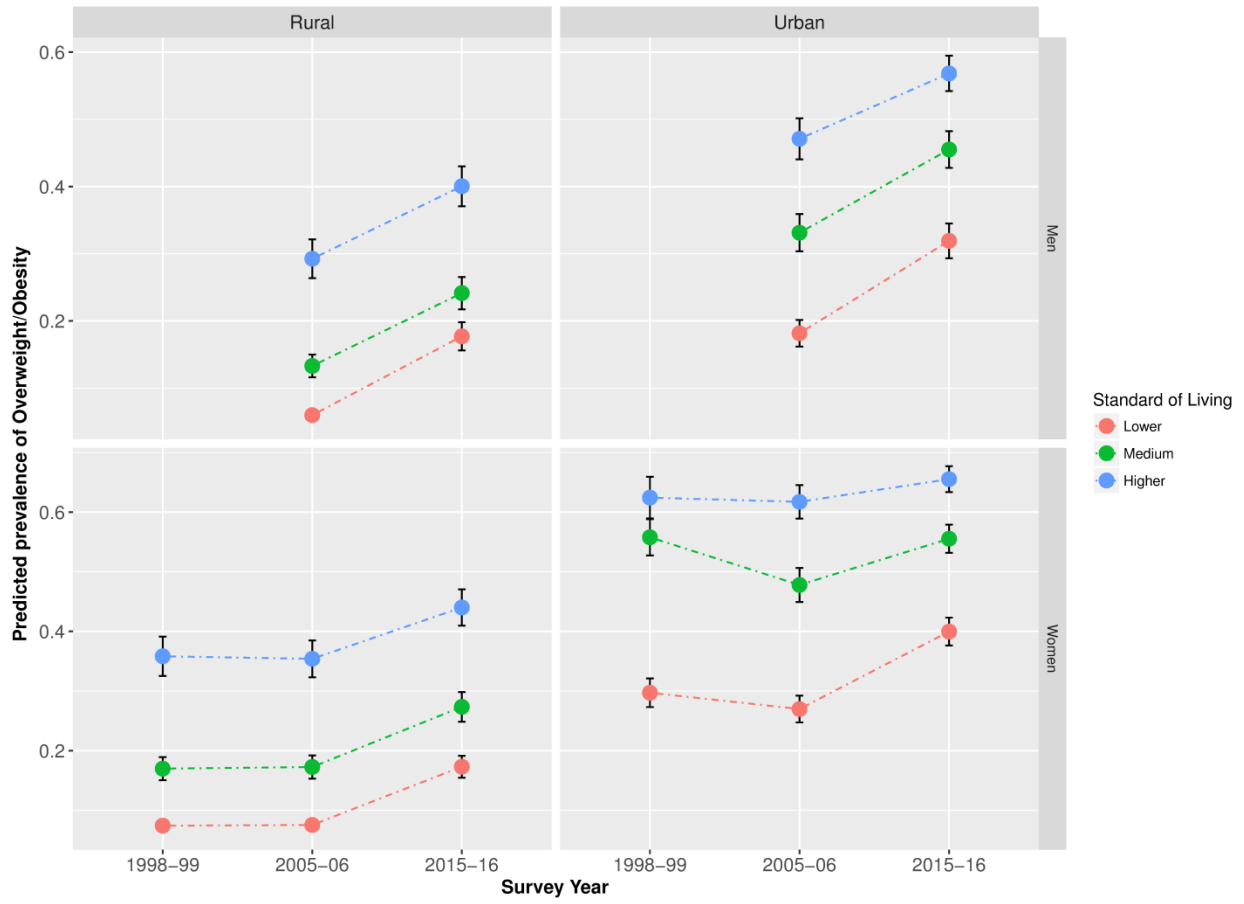

Supplement: bmjopen-2018-023935supp001.pdf [file bmjopen-2018-023935supp001.pdf]
